# Supplementary figures and images for: Monocyte-specific Accessibility of a Matrix Attachment Region in the Tumor Necrosis Factor Locus
Source: PubMed Central journal article supplement — J Biol Chem. 2011 Oct 25;286(51):44126–33. doi: 10.1074/jbc.M111.272476 (PMC3243562; doi:10.1074/jbc.m111.272476), 2011-10-25

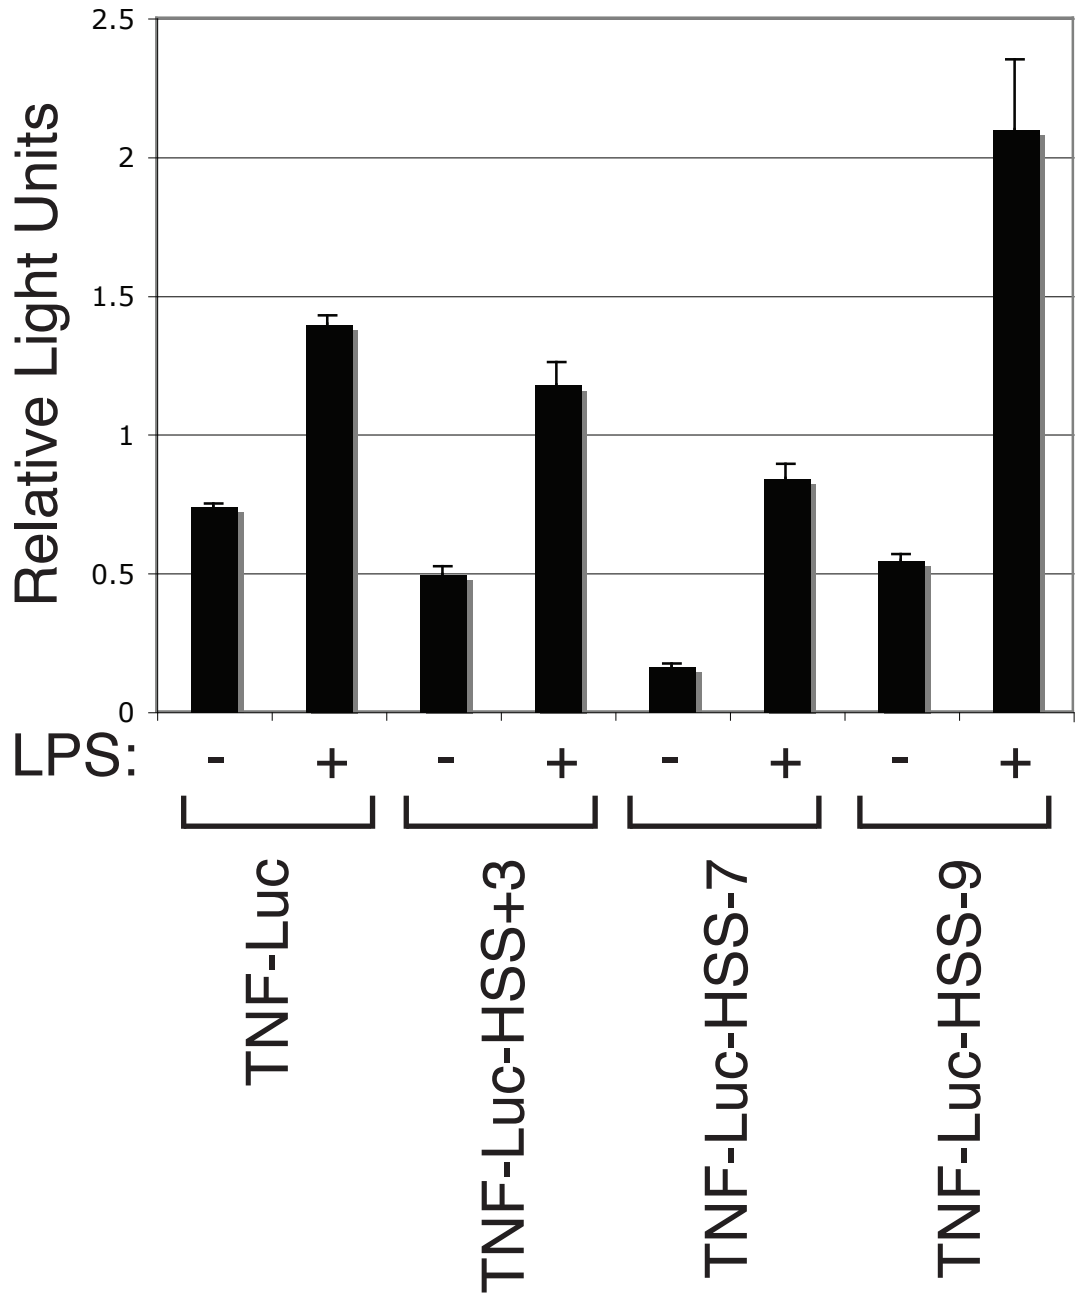

Supplement: supp_M111.272476_jbc.M111.272476-1.pdf [file supp_M111.272476_jbc.M111.272476-1.pdf]

### Color key for alignment scores

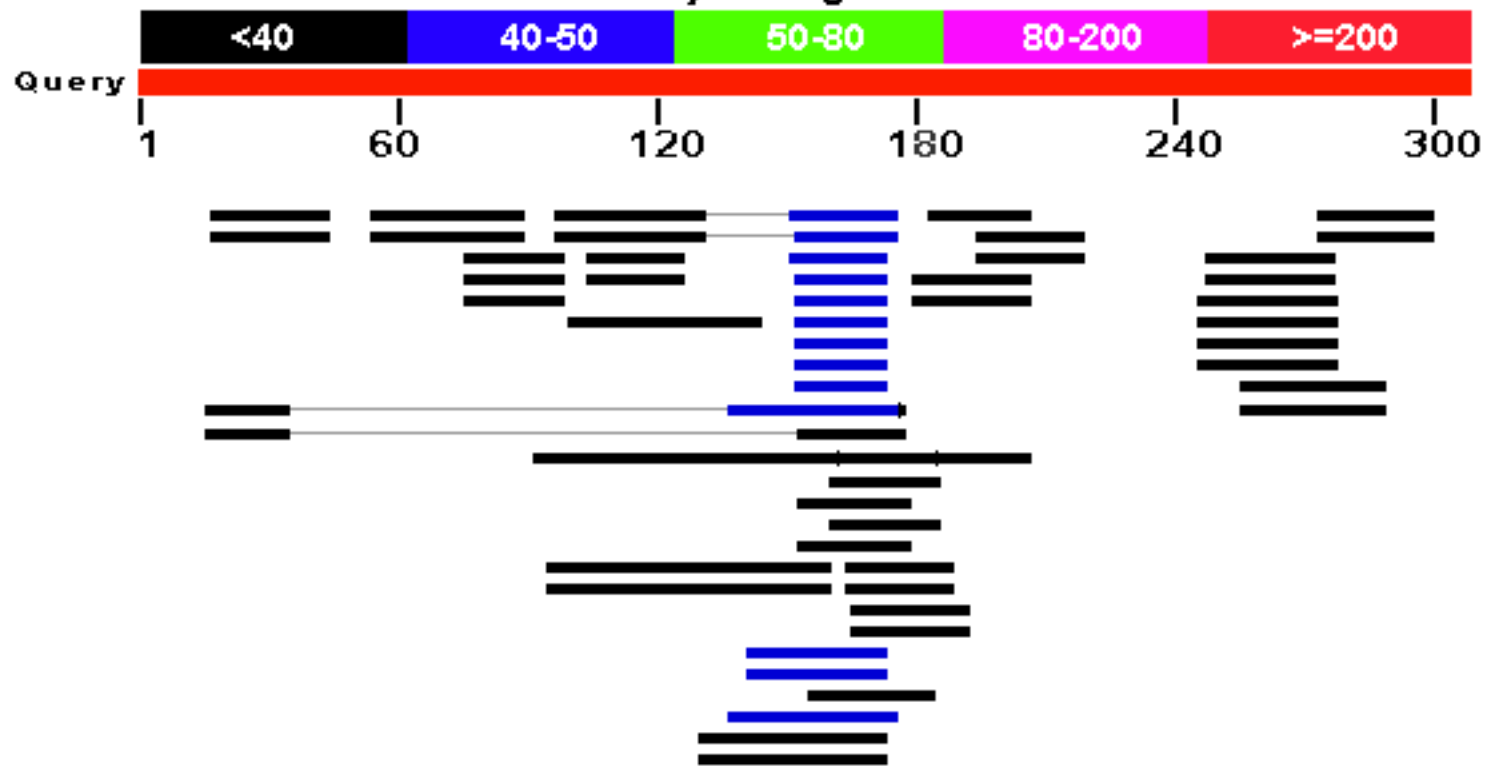

Supplement: supp_M111.272476_jbc.M111.272476-3.pdf [file supp_M111.272476_jbc.M111.272476-3.pdf]

A

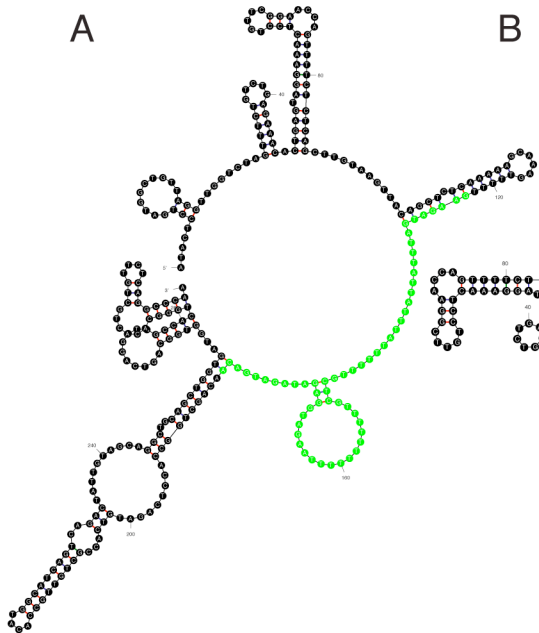 $dG = -36.30$ 

B

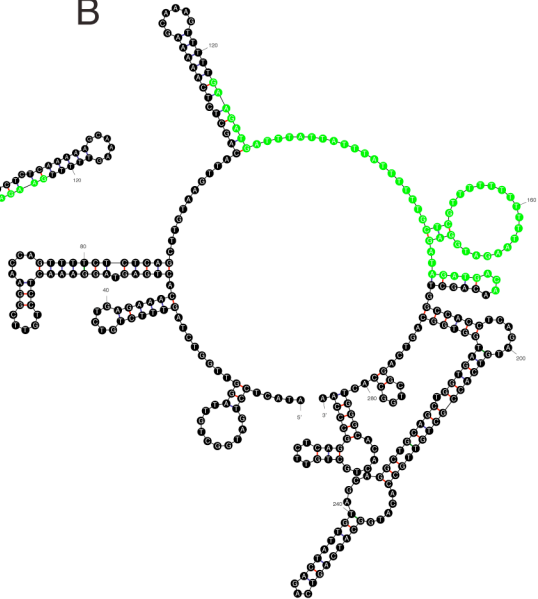 $dG = -35.68$

Supplement: supp_M111.272476_jbc.M111.272476-5.pdf [file supp_M111.272476_jbc.M111.272476-5.pdf]
